1 **Genetic structure of a patchily distributed philopatric migrant: implications for**  
2 **management and conservation**

3 Anastasios Bounas<sup>1,2\*</sup>, Dimitris Tsaparis<sup>3</sup>, Ron Efrat<sup>4</sup>, Gradimir Gradev<sup>5</sup>, Marco Gustin<sup>6</sup>,  
4 Kresimir Mikulic<sup>7</sup>, Airam Rodríguez<sup>8</sup>, Maurizio Sarà<sup>9</sup>, Georgios Kotoulas<sup>3</sup>, Konstantinos  
5 Sotiropoulos<sup>1</sup>

6 <sup>1</sup>*Molecular Ecology and Conservation Genetics Lab, Department of Biological Applications*  
7 *and Technology, University of Ioannina, 45110, Ioannina, Greece.*

8 <sup>2</sup>*Hellenic Ornithological Society – BirdLife Greece, Themistokleous 80, 10681 Athens, Greece.*

9 <sup>3</sup>*Institute of Marine Biology, Biotechnology and Aquaculture, Hellenic Centre for Marine*  
10 *Research, Heraklion, 71500, Greece.*

11 <sup>4</sup>*Mitrani Department of Desert Ecology, The Jacob Blaustein Institutes for Desert Research,*  
12 *Ben-Gurion University of the Negev, IL-8499000, Israel.*

13 <sup>5</sup>*Green Balkans NGO, 1 Skopie Street, 4004, Plovdiv, Bulgaria.*

14 <sup>6</sup>*LIPU (Lega Italiana Protezione Uccelli) - BirdLife Italia, Conservation Department, Via Udine*  
15 *3, I-43100, Parma, Italy.*

16 <sup>7</sup>*Association BIOM – BirdLife Croatia, Preradoviceva 34, 10000, Zagreb, Croatia.*

17 <sup>8</sup>*Department of Evolutionary Ecology, Estación Biológica de Doñana (CSIC), Avda. Américo*  
18 *Vespucio 26, 41092, Seville, Spain.*

19 <sup>9</sup>*Section of Animal Biology, Department STEBICEF, University of Palermo, Via Archirafi 18,*  
20 *90123 Palermo, Italy.*

21

22 \*Corresponding author: [abounas@cc.uoi.gr](mailto:abounas@cc.uoi.gr), tel: +306973573235

23 Running Title: Conservation Genetics of the Lesser Kestrel

24

25 Significant demographic fluctuations can have major genetic consequences in wild  
26 populations. The Lesser Kestrel (*Falco naumanni*) has suffered from both population declines  
27 and range fragmentation during the second half of the 20th century. In this study we  
28 analysed multilocus microsatellite data to assess the genetic structure of the species. Our  
29 analysis revealed significant genetic structuring of Lesser Kestrel populations, not only at  
30 cross-continental scale, but also regionally within Central and Eastern (CE) Mediterranean.  
31 We detected signs of genetic bottlenecks in some of the peripheral populations coupled  
32 with small effective population sizes. Values of genetic differentiation among the largest  
33 populations were low, albeit significant, whereas the small peripheral CE Mediterranean  
34 populations showed higher levels of differentiation from all other populations. Gene flow  
35 levels were relatively low among the discontinuously distributed populations of the CE  
36 Mediterranean region. We argue that the observed spatial genetic structure can be  
37 attributed at some level to the past demographic decline experienced by the species. Finally,  
38 we identify management units in the region, and inform the design of conservation actions  
39 aiming at the increase of population sizes and dispersal rates among peripheral populations.

40

41 Keywords: *Falco naumanni* -Genetic Diversity-Lesser Kestrel-Management Units-  
42 Mediterranean-Microsatellites-Migration Rates

43

44

45

46

47

## 48 INTRODUCTION

49 In many animal species, the patterns of genetic differentiation and gene flow are highly  
50 influenced by the geographical characteristics of their habitats as well as their migratory  
51 behavior (Willoughby *et al.*, 2017). Birds, and specifically raptors, can show long-distance  
52 migratory behavior and also exhibit natal and breeding site fidelity. As a general pattern,  
53 migratory populations of raptors have been found to have weaker genetic structure and  
54 higher genetic diversity than resident populations (Miller *et al.*, 2012; Willoughby *et al.*,  
55 2017). For example some individuals might migrate through a different route upon their  
56 return on the breeding grounds, and consequently disperse and breed far from their natal  
57 site (Garcia *et al.*, 2011). On the other hand, philopatry reduces or even inhibits gene flow  
58 among populations leading to increased genetic differentiation. Patchily distributed and  
59 locally isolated populations are susceptible to a greater influence of genetic drift which may  
60 result in a decrease in genetic diversity and fitness, thus compromising a species' ability to  
61 adapt to a changing environment (Amos & Balmford, 2001). Genetic drift and inbreeding are  
62 expected to be stronger in peripheral populations relative to core ones, due to their small  
63 population sizes and low immigration rates (Vucetich & Waite, 2003; Hanski & Gaggiotti,  
64 2004). Therefore, the assessment of genetic structure and the identification of its underlying  
65 processes become essential tasks providing valuable information towards the design and  
66 implementation of effective conservation strategies. For example, identification of  
67 management units (MUs, Moritz, 1994; Taylor & Dizon, 1999; Palsbøll, Berube & Allendorf,  
68 2007) would be central to delineate populations for monitoring and thus aid their short-term  
69 management.

70 The Lesser Kestrel (*Falco naumanni*, Fleischer, 1818) is a small migratory falcon breeding  
71 from the Mediterranean basin across Middle East and Central Asia to Mongolia and China,  
72 and wintering in sub-Saharan Africa (Cramp & Simmons, 1980). The species underwent rapid

73 declines throughout its European range in the early 1960s mainly as a result of agricultural  
74 intensification and subsequent habitat degradation and land use changes (Iñigo & Barov,  
75 2010). In Central-Eastern Mediterranean region (hereafter CE Mediterranean) and especially  
76 in the Balkan Peninsula, the decline was dramatic, leading to local extinctions and  
77 consequently to significant range contraction and fragmentation (Iñigo & Barov, 2010).  
78 Currently, the species shows a patchy distribution and is considered to have a “depleted”  
79 status in the region (BirdLife International, 2017a). The two largest (core) populations are  
80 located in the Apulia-Basilicata area of southern Italy and in Central Greece, still holding  
81 several thousand pairs (BirdLife International, 2017a). Peripheral populations of smaller size,  
82 still exist in the Former Yugoslav Republic of Macedonia (Uzunova & Lisichanets, 2016), in  
83 Sicily (Sarà, 2004), the European part of Turkey (Kmetova *et al.*, 2012) and throughout  
84 continental Greece as well as on some of the Greek islands (Legakis & Maragou, 2009).  
85 Finally, a small geographically isolated population is located in Croatia, at the northernmost  
86 edge of the species European distribution (Mikulic *et al.*, 2013). Certain conservation actions,  
87 mainly implemented in Western Europe, have led to a stabilization and slightly positive  
88 population trend and subsequently the down-listing of the species from Vulnerable to Least  
89 Concern (BirdLife International, 2017b).

90 Several previous studies have examined the genetic structure of the species and the  
91 underlying processes, at both continental (Wink, Sauer-Gurth & Pepler, 2004; Alcaide *et al.*,  
92 2008a; Alcaide *et al.*, 2008b) and finer spatial scales (Ortego *et al.*, 2008a; Ortego *et al.*,  
93 2008b; Alcaide *et al.*, 2009; Di Maggio *et al.*, 2014). It has been proposed that Asian Lesser  
94 Kestrels are considerably differentiated from European conspecifics, whereas populations  
95 across the Western Palearctic seem to follow an isolation by distance pattern while  
96 maintaining high levels of genetic diversity (Wink *et al.*, 2004; Alcaide *et al.*, 2008b). On a  
97 regional scale though, it seems that the species' philopatry does not lead to fine-scale  
98 genetic structuring (Alcaide *et al.*, 2009); nevertheless, population structure could emerge,

99 depending on the size and the degree of spatial isolation and the levels of gene flow among  
100 populations (Ortego *et al.*, 2008b). Such restricted gene flow patterns do not necessarily  
101 result from physical barriers hindering dispersal, especially in efficient dispersers such as the  
102 Lesser Kestrel, but can be attributed also to their philopatric behaviour. Indeed, the species  
103 shows high philopatry, with adult birds returning to breed close to their previous breeding  
104 territories (Negro, Hiraldo & Donázar, 1997), however, juveniles disperse more and in  
105 greater distances (Serrano & Tella, 2003; Bounas *et al.*, 2016a). At least at a continental  
106 scale, Lesser Kestrels show strong migratory connectivity, i.e. there is a spatial segregation of  
107 breeding populations at the wintering range: European populations winter in the Sahel,  
108 while Asian populations winter in east and South Africa (Wink *et al.*, 2004; Rodriguez *et al.*,  
109 2009)

110 Herein, we examine the genetic structure of the Lesser Kestrel, 1) across the broader  
111 species range and 2) within the CE Mediterranean. We aim to identify patterns of genetic  
112 variation and gene flow among populations as well as their underlying processes. Such  
113 information could be of crucial importance for conservation programs to identify the need of  
114 local scale conservation actions and inform their design.

## 115 MATERIAL AND METHODS

### 116 POPULATION SAMPLING AND DNA EXTRACTION

117 Samples were obtained from 12 breeding sites in CE Mediterranean, where the species  
118 shows a fragmented distribution as well as from Mongolia, Israel and two sites from Spain.  
119 Individuals sampled in Bulgaria originated from Spain and were used for the reinforcement  
120 of the species, thus treated as if they were sampled in Extremadura (ES/BG; Fig. 1). A total of  
121 295 individuals were sampled during four consecutive breeding seasons (2013 - 2016) with  
122 the exception of Spanish samples (SES) that were collected in 2007. Birds were caught by

123 hand in the nest or using mist nets or spring traps close to the nest. To minimize biases  
124 associated with relatedness only a single fledgling per brood was sampled. Two drops of  
125 blood (~50µl) were obtained from each individual by leg-pricking and immediately stored in  
126 blood storage cards (NucleoCards®) at room temperature until DNA extraction. DNA was  
127 extracted using the NucleoSpin Tissue kit (Macherey-Nagel) following the manufacturer's  
128 protocol.

#### 129 MICROSATELLITE AMPLIFICATION AND GENOTYPING

130 Each individual was genotyped at a total of 18 microsatellite loci. Seven loci were originally  
131 isolated from the Peregrine Falcon *Falco peregrinus* (Nesje *et al.*, 2000; Alcaide *et al.*, 2008a),  
132 whereas 11 were developed specifically for the Lesser Kestrel (Ortego *et al.*, 2007; Padilla *et al.*, 2009). Details on loci properties and primers used for their amplification are presented in  
133 Supporting information, Table S1. All loci were amplified in five multiplex reactions using  
134 forward 5'-fluorescent-labelled primers and the KAPA2G Fast Multiplex PCR Kit (Kapa  
135 Biosystems). Each 12.5 µl reaction contained 2pM of each primer and 1x KAPA2G Mix and  
136 was carried out using the following profile: an initial denaturation step of 3 min at 95 °C, 30  
137 cycles of 15 s at 95°C, 30 s at 60 °C, 30 s at 72 °C, with a final extension step of 10 min at 72  
138 °C. PCR products were separated and visualized using an ABI 3730xl capillary sequencer  
139 (Applied Biosystems) and genotypes were scored by eye with STRand v.2.4.59 (Toonen &  
140 Hughes, 2001). Randomization of samples was employed throughout lab processes to avoid  
141 any plate/gel specific errors that might lead in population specific biases (Meirmans, 2015).  
142 In addition, a subset of 50 individuals was re-genotyped to quantify error rates due to allelic  
143 dropout or genotyping errors but no inconsistencies were detected. We used the package  
144 "MsatAllele" (Alberto, 2009) in R 3.2.2 (R Core Team, 2015) to allocate alleles to their  
145 respective size classes. Genotyping errors, due to null alleles and stuttering, were examined  
146 for all loci and sampled populations using MICROCHECKER (Van Oosterhout *et al.*, 2004).  
147

148 Two loci (Fnd1.2 and Fnd2.1) were omitted from further analyses due to the presence of null  
149 alleles and extensive stuttering respectively, and thus the full analysis was based on the  
150 remaining 16 microsatellite loci.

#### 151 GENETIC ANALYSES

152 To evaluate the genetic variability in each population, standard genetic diversity indices ( $A$ :  
153 number of alleles,  $H_O$ : observed and  $H_E$ : expected heterozygosity) were calculated using the  
154 program GENALEX v.6.5 (Peakall & Smouse, 2012). Rarefied Private Allelic richness ( $\pi$ )  
155 estimates were produced using HP-RARE (Kalinowski, 2005). Allelic richness ( $A_R$ ) corrected  
156 for different sample sizes was calculated using FSTAT 2.9.3.2 (Goudet, 2002). The same  
157 software was used to calculate the inbreeding coefficient ( $F_{IS}$ ), test for deviations from  
158 Hardy-Weinberg proportions at each locus and sampled population, as well as for linkage  
159 disequilibrium (LD) using 1000 randomizations and adjusting significance for multiple  
160 comparisons (adjusted P value < 0.0003). In addition we performed a Chi-Square test and  
161 Fisher's method to confirm the Hardy Weinberg (HW) equilibrium results.

162 The software Arlequin 3.5.1.3 (Excoffier & Lischer, 2010) was used to calculate  $F_{ST}$  values  
163 between all pairs of sampled populations and test them for statistical significance using  
164 10000 permutations. In addition to  $F_{ST}$ , we also calculated Jost's D ( $D_{est}$ ) as an unbiased  
165 estimator of differentiation that performs better than other relatives, in cases of markers  
166 with different number of alleles (Gerlach *et al.*, 2010) as is the case in this study (see  
167 Supporting information, Table S1). Pairwise D values (mean  $D_{est}$ ) among populations were  
168 calculated with the R-package "DEMEtics" (Gerlach *et al.*, 2010) and statistical significance  
169 was tested using 1,000 bootstrap iterations. For both estimators, p-values were adjusted for  
170 multiple comparisons after the B-H method (Benjamini & Hochberg, 1995). We used IBDWS  
171 v.3.23 (Jensen, Bohonak & Kelley, 2005) in order to obtain any statistically significant  
172 associations between pairwise genetic ( $F_{ST}/[1-F_{ST}]$ ) and linear geographic (log km) distance

173 matrices using 30,000 randomizations. The analysis was performed both on the full and the  
174 reduced (i.e. CE Mediterranean) datasets.

175 To evaluate the genetic population structure, the Bayesian clustering software  
176 STRUCTURE 2.3.4 (Pritchard, Stephens & Donnelly, 2000) was used to infer the number of  
177 genetically homogeneous clusters present in the dataset. The analysis was conducted both  
178 on the full dataset as well as only on the populations of CE Mediterranean region. For both  
179 analyses we assumed the admixture ancestry model and correlated allele frequencies  
180 (Falush, Stephens & Pritchard, 2003), using sampling location as prior information  
181 (LOCPRIOR model; Hubisz *et al.*, 2009) as it is deemed to be more sensitive at inferring  
182 population structure at lower levels of divergence, which is expected in good dispersers such  
183 as birds. Runs were set with a burn-in period of  $2 \times 10^5$  iterations followed by  $10^6$  MCMC  
184 steps with 20 replicates for each K value (1 to 15 for the full dataset and 1 to 12 for CE  
185 Mediterranean). STRUCTURE runs were implemented on a beowulf cluster using  
186 PARASTRUCTURE Perl script (Lagnel, 2015) and STRUCTURE plots were constructed using  
187 DISTRUCT (Rosenberg, 2004). The most likely value of genetic clusters, K, was evaluated  
188 following the  $\Delta K$  method (Evanno, Regnaut & Goudet, 2005) implemented in STRUCTURE  
189 HARVESTER (Earl & Vonholdt, 2012), as well as by calculating the posterior probability for  
190 each K. We present all cases with high probability that warrant a biological interpretation  
191 (Meirmans, 2015) and are supported by both STRUCTURE runs.

192 Finally, the breeding populations of CE Mediterranean were grouped according to  
193 Structure results as well as  $F_{st}$  and  $D_{est}$  calculations, and the directional contemporary gene  
194 flow and its relative magnitude among them was estimated using the divMigrate function  
195 (Sundqvist *et al.* 2016) in the R-package “diveRsity” (Keenan *et al.* 2013). The method  
196 provides a relative (to within the analysis) migration network graph aiming to visualize the  
197 gene flow patterns among populations, with the resulting metric representing a proportion



198 of the gene flow among areas, scaled to the largest magnitude estimated. Populations are  
199 represented as nodes and the properties of the lines connecting them are based on the  
200 relative strength of gene flow. Populations that exhibit strong gene exchange between them  
201 but weak gene flow with others tend to cluster closely together, reflecting patterns of  
202 genetic structure. The method is described in detail in Sundqvist *et al.* (2016). We used  $N_M$   
203 (Alcala, Goudet & Vuilleumier, 2014) as a measure of genetic distance, and tested whether  
204 gene flow among populations was asymmetrical using 10000 bootstrap iterations.

205 Signs of bottlenecks were evaluated in grouped populations using three approaches. First  
206 we calculated  $M$ , a ratio based on the number of alleles to the allelic size range (Garza &  
207 Williamson, 2001) in Arlequin.  $M$  will be smaller in populations that have suffered a decline  
208 than in populations that are in mutation-drift equilibrium. A test for heterozygosity excess  
209 was performed in BOTTLENECK (Piry, Luikart & Cornuet, 1999) using the Wilcoxon signed  
210 rank test running 1000 iterations and using the two-phase model (TPM). As the  
211 microsatellites we used are either of dinucleotide perfect repeats or of imperfect repeats,  
212 both of which may tend toward the infinite allele model (IAM; Cornuet and Luikart, 1996),  
213 we fixed the proportions of the TPM in favour of the IAM (Cristescu *et al.*, 2010) including  
214 20% of the stepwise mutation model (SMM) and 80% of IAM. We finally tested for a mode-  
215 shift distortion using a graphical approach, by plotting the number of alleles in 10 allele  
216 frequency classes with 0.1 intervals, according to Luikart *et al.* (1998). In a population at  
217 equilibrium, alleles with frequencies in the first class ( $<0.1$ ) are expected to be more  
218 numerous than those belonging to the second class, therefore allele frequencies present a  
219 characteristic L-shaped distribution. Plots were examined for mode-shift distortions that  
220 would be consistent with a bottlenecked population (Luikart *et al.*, 1998; Cristescu *et al.*,  
221 2010). Plots were produced in R 3.2.2 and allele frequency calculations were performed  
222 using the R package “Gstudio” (Dyer, 2014). Finally, the effective population size ( $N_E$ ) along  
223 with 95% confidence intervals (CIs) were estimated using the bias-corrected version of the

224 method based on linkage disequilibrium (Hill, 1981; Waples, 2006) as implemented in  
225 NeESTIMATOR v.2.01 (Do *et al.*, 2014).  $N_E$  estimates were obtained for all but the core  
226 populations (ES, APU, CNG) and Mongolia, as it is very difficult to obtain reliable estimates  
227 for large populations using this method (Waples & Do, 2010).

## 228 RESULTS

229 All microsatellite markers were found to be polymorphic across populations and the number  
230 of alleles per locus ranged from four (loci Fnd1.4, Fp86-2, Fp89) to 38 (locus Fnd1.6;  
231 Supporting information, Table S1).

## 232 GENETIC DIVERSITY

233 We did not detect any differences in the mean allelic richness across populations. The  
234 average  $H_O$  was 0.64,  $H_O$  and  $H_E$  were similar and  $F_{IS}$  was not significant in all cases (Table 1).  
235 Private alleles were present in all sampled populations with the exception of Croatia (CRO),  
236 Komotini (KAL) and one subpopulation in Central Greece (TRI). Generally, populations did  
237 not deviate from Hardy-Weinberg proportions but some deviations of individual loci were  
238 detected: four populations (CRO, LIM, ISR, MON) showed deviations at two, one, one and  
239 two out of the 16 loci respectively (see Supporting information, Table S4). Since these loci  
240 did not show consistent deviations across all populations, we included them in subsequent  
241 analyses attributing this disequilibrium in processes specific to those populations. No LD was  
242 detected between any of the loci across all populations.

## 243 POPULATION STRUCTURE

244 Pairwise  $F_{ST}$  and  $D_{est}$  values were highly correlated (Pearson's correlation:  $r = 0.95$ ,  $P < 0.001$ ).  
245 Estimates of both  $F_{ST}$  and  $D_{est}$  (Table 2) varied between population pairs ( $F_{ST}$ : 0.003 – 0.06;  
246  $D_{est}$ : 0.02 – 0.19), with all the core populations of Europe (Spain, Apulia, Central Greece)  
247 showing low differentiation among them. On the other hand, Mongolia and Israel seem

248 differentiated from all others, while the small peripheral CE Mediterranean populations  
249 showed higher levels of differentiation from all other populations. This was particularly  
250 evident for the populations of Croatia and Limnos where the highest values of  $D_{est}$  were  
251 recorded when compared to all other populations (Table 2). Mantel tests showed that  
252 genetic distance is not significantly correlated with geographical distance across all sampled  
253 populations ( $r = 0.33$ ,  $P = 0.1$ , Supporting information, Figure S1). Conversely, genetic  
254 divergence of CE Mediterranean populations correlated significantly with the geographical  
255 distance among them ( $r = 0.57$ ,  $P = 0.01$ , Supporting information, Figure S1).

256 The Bayesian clustering method implemented in STRUCTURE suggested the presence of  
257 population structuring. When all individuals were modeled, the  $\Delta K$ -method suggested two  
258 clusters ( $K = 2$ ) as the most likely population structure (although the posterior probability  
259 was higher for  $K = 3$ ; Supporting information, Figure S2, Table S2). For  $K = 2$  the admixture  
260 model indicated two gene pools with all European populations showing high membership  
261 coefficients in the first cluster, and the MON and LIM populations belonging to the second  
262 (Fig. 2). This second gene pool seems to be present in all populations in Northern and  
263 Central Greece (CNG) whereas absent from all other western populations. Lesser Kestrels  
264 from Israel (ISR) were found to be highly admixed, exhibiting a mixed ancestry from both  
265 clusters (Fig. 2). For  $K = 3$ , the model adds another gene pool that is mostly represented by  
266 the Trans-Adriatic populations of Croatia (CRO), Apulia (APU) and Sicily (SIC) whereas Israel  
267 (ISR) still seems to be of mixed ancestry. All subpopulations within Spain (SES, ES/BG) and  
268 Central Greece (TRI, LAR, VOL) showed identical admixture proportions among them,  
269 implying no further substructure (Fig. 2).

270 When individuals from the CE Mediterranean were modeled separately, the  $\Delta K$ -method  
271 suggested  $K = 2$  as the optimal number of clusters, whereas posterior probability estimates  
272 suggested the presence of four clusters (Supporting information, Figure S3, Table S3). The

273 populations of Croatia (CRO) and Limnos (LIM) constitute two different genetic clusters, the  
274 one present in Limnos (LIM) extending throughout Greek populations from Northern to  
275 Central Greece (CNG), while two other clusters are present in all other populations in  
276 different proportions (GIA and LES populations of western Greece form a single group). The  
277 maximum value of five clusters further partitions the Sicilian population (SIC) as a separate  
278 group. It is apparent that there is no substructure in the Central and Northern Greek  
279 population, CNG (Fig. 2).

280 Because of the lack of any structure among the subpopulations of Central Greece (TRI,  
281 LAR, VOL) and Kilkis (KIL), we pooled the individuals from KIL into the central Greek group  
282 (CGR) to estimate the directional relative migration networks using divMigrate. The  
283 migration network (Fig. 3) reflects at some level the genetic structuring revealed by  
284 STRUCTURE analysis, as the core populations of the region (APU, CGR) cluster closely in the  
285 network space showing high gene flow and relatively low differentiation between them. The  
286 GIA and KAL populations also exhibited a relatively high gene flow with the core populations,  
287 with the former (GIA) showing connection with both APU and CGR while the latter (KAL)  
288 presents high gene flow rates only with CGR. The rest of the groups showed relatively  
289 reduced gene flow towards the core populations. It should be noted that as a general  
290 pattern, all peripheral populations seem to exchange migrants exclusively with the core  
291 populations but not between them, appearing isolated from each other (i.e. a star-shaped  
292 pattern of the migration network; Fig. 3), resembling a mainland-island metapopulation type  
293 (and not a patchy population type). However, there was no evidence of significantly  
294 asymmetric gene flow between any pair of populations.

#### 295 DEMOGRAPHIC PARAMETERS

296 *M* ratios were found to be lower than the threshold value of 0.68 in all populations, which  
297 according to Garza & Williamson (2001) suggests that all populations have suffered a past

298 bottleneck event. The Wilcoxon signed rank test conducted in BOTTLENECK software,  
299 detected signs of a recent population bottleneck for Sicily (SIC), Limnos island (LIM) and  
300 Israel (ISR) populations (Table 3). On the other hand, inspection of plots of allele frequency  
301 classes for recent bottlenecks did not reveal any mode-shift distortion in any of the  
302 populations. However, they did show that the Croatian population (CRO) is moving towards  
303 allele fixation, since this was the only population that exhibited an allele frequency in the  
304 class 0.9-1.0 (see Supporting information, Figure S4). Most of the peripheral populations  
305 were found to have small effective population sizes (Table 3), ranging from 24.2 (LIM) to  
306 88.4 (LES). However, in some cases (SIC, LES and ISR populations) results should be treated  
307 with caution as 95% CIs were broad.

## 308 DISCUSSION

309 Across all sampled populations, STRUCTURE analysis suggested the presence of two  
310 major clusters concurring with the longitudinal distribution of the species; a 'western'  
311 (European) and an 'eastern' (Asian) cluster that are both represented in the population of  
312 Israel. This result reflects the proposed phylogeographic pattern of the species; based on the  
313 mitochondrial Cyt b region, European and Asian populations were found to be divergent  
314 whereas birds from Israel seem to cluster with both of them indicating a degree of genetic  
315 mixing (Wink *et al.*, 2004). Interestingly, a comparison of plumage patterns of Lesser Kestrels  
316 unveiled substantial differences between individuals of European and Chinese descent  
317 whereas birds from Asian/Middle East populations (including Israel) exhibit an intermediate  
318 plumage pattern (Corso *et al.*, 2016). In addition, this eastern cluster is highly represented in  
319 the eastern Greek population of Limnos Island (LIM) and extends gradually up to central  
320 Greece suggesting a population consisting of birds of eastern origin possibly from  
321 populations of Asia Minor. Future inclusion of samples from Western Anatolia (i.e. Turkey)  
322 and the Middle East could shed light on such hypotheses.

323 Despite the high private allelic richness, suggesting that gene flow could be restricted (at  
324 some level), our analysis showed low  $F_{ST}$  values among the core populations of Europe  
325 (Spain, Apulia region in Italy and Central Greece) which is in concordance with previous  
326 larger-scale studies (Alcaide *et al.*, 2009).  $D_{est}$  on the other hand, generally showed higher  
327 values of differentiation among populations including the core ones (ES and APU). We found  
328 significant levels of differentiation among CE Mediterranean populations and a correlation of  
329 pairwise genetic and geographic distance. We should note that STRUCTURE may  
330 overestimate genetic structure in datasets characterized by such correlation (Frantz *et al.*,  
331 2009). Correlation between genetic and geographic distance has been previously reported  
332 for the species at both local (Ortego *et al.*, 2008b) and large spatial scales (Alcaide *et al.*,  
333 2008a; Alcaide *et al.*, 2008b) and can be driven by the distance-dependent dispersal  
334 exhibited by the species (Serrano & Tella, 2003; Serrano *et al.*, 2003; Ortego *et al.*, 2008b).  
335 Some long-distance dispersal events that could have facilitated gene flow among  
336 populations have been reported across the CE Mediterranean (Gustin, Mendi & Pedrelli,  
337 2011; Bounas *et al.* 2016a). Nevertheless, some of these movements took place in the '50s  
338 when the species showed a wider distribution. Actually, restricted dispersal in a fragmented  
339 range, coupled with high philopatry rates, along with a relatively short generation time of  
340 the species (average lifespan of 4-6 years; Newton & Olsen, 1990; Negro, 1997), might have  
341 contributed to a more frequent individual turnover in the breeding colonies thus allowing  
342 relatively quick changes in allele frequencies that led to the patterns of genetic  
343 differentiation observed in the region (Ortego *et al.*, 2008a).

344 Our results for genetic bottlenecks seem to be contrasting, at first glance.  $M$  ratios  
345 suggest that the reported past population declines have indeed left genetic bottleneck signs  
346 in all populations throughout the species' range while tests for heterozygosity excess  
347 suggested bottlenecks only in three populations. Detection of a bottleneck using  $M$  ratios  
348 but not heterozygosity excess is expected when a bottleneck is older, more severe, and/or

349 the population has recovered (Williamson-Natesan, 2005). Thus Lesser Kestrel populations  
350 have at some point in the past undergone a severe, prolonged bottleneck, whereas in some  
351 areas (ISR, SIC, LIM) they seem to have experienced more recent, population declines. The  
352 Israeli population (ISR) has gone through a steep decline and is estimated to be less than  
353 10% of the population prior to 1950 (Liven-Schulman *et al.*, 2004). The geographic position  
354 of Israel population could explain the increased levels of diversity despite its small  $N_E$  as a  
355 result of the genetic admixture of immigrants from other European or Asian populations in  
356 the area. Recent bottleneck signs were also detected in two of the peripheral populations in  
357 the CE Mediterranean region (SIC, LIM), that were also differentiated and showed a  
358 relatively limited gene flow with other populations (Fig. 3) and small  $N_E$  but nevertheless  
359 similar diversity patterns. Despite its small  $N_E$ , Ioannina (GIA) population exhibits high levels  
360 of diversity and gene flow with both core populations of CE Mediterranean (APU, CNG), a  
361 process that can alleviate the bottleneck effects. Since Ioannina is a known premigratory site  
362 for the species (Bounas *et al.*, 2016b), these high levels of diversity could be explained by  
363 immigrants from other populations, that is individuals that visit the site during premigration  
364 and return to breed there. Besides, it has been suggested that non-breeding distributions  
365 can shape the genetic structure of populations (Szczyś, Oswald & Arnold, 2017).

366 Finally, genetic drift could also play a role on the observed genetic patterns of  
367 populations in the region, since they exhibit small size and limited gene flow with other  
368 populations. This is particularly evident in the small Croatian population. This population  
369 consists of only 25 pairs and was recently discovered (Mikulic *et al.*, 2013). Therefore we are  
370 ignorant regarding its history, that is if the population was recently founded or present  
371 historically but not detected. The population did not show any signs of bottleneck but there  
372 seems to be a loss of rare alleles as well as signs of allele fixation (Table 1, Supporting  
373 information, Figure S4). Despite that, there is no observed decrease in heterozygosity, which  
374 could be consistent with a scenario of a recently founded population that experienced the

375 effects of genetic drift, since heterozygosity can be relatively insensitive to the loss of rare  
376 alleles due to drift (Allendorf, 1986; Allendorf, Aitken & Luikart, 2013).

#### 377 CONSERVATION IMPLICATIONS

378 According to our results, the genetic structure of the CE Mediterranean populations of the  
379 Lesser Kestrel appears to reflect to some extent the demographic decline that led to its  
380 range fragmentation. Therefore, we suggest the management of the whole CE  
381 Mediterranean population as a single conservation unit (ESU). However, the population  
382 could be divided into four different management units (MUs) since three peripheral  
383 populations (CRO, LIM, SIC) showed limited migration rates and different allele frequencies  
384 from all the other populations. Thus a mixed strategy that aims to preserve the high diversity  
385 of the core populations of Italy and Greece, while focusing on the recovery of bottlenecked  
386 peripheral populations (SIC, LIM), should be appropriate for the conservation of the species  
387 in the region.

388 Translocations of individuals from the core populations to the peripheral or newly  
389 founded colonies could be used as an effective conservation action (Morandini *et al.*, 2017).  
390 Based solely on our results from the microsatellite analysis, the use of birds from the core  
391 populations seems to be an acceptable action since they were found to exhibit high  
392 diversity and low differentiation from all the others. However, the fact that our results were  
393 based solely on the analysis of selectively neutral loci prevents us from conclusions  
394 regarding the adaptive and evolutionary consequences of such action (Holderegger, Kamm  
395 & Gugerli, 2006). Thus any future translocation programmes should consider maximizing  
396 both the genetic and the adaptive similarity between populations.

397

#### 398 ACKNOWLEDGEMENTS



399 We are grateful to Action for Wildlife and ANIMA rehabilitation centers, the Lesser Kestrel  
400 Recovery project team (LIFE11 NAT/BG/360), J. Hernandez-Pliego and G. Giglio for helping  
401 with sample collection. D. Vavylis, G. Vakis and E. Toli assisted in the fieldwork. LIFE for the  
402 Lesser Kestrel project team (LIFE+ 11 NAT/GR/1011), and namely K. Vlachopoulos, S.  
403 Polymeros and A. Evangelidis greatly helped with sampling in Central Greece. N. Chakarov  
404 and M. Stubbe kindly provided samples from Mongolia and we are thankful for that. V.  
405 Saravia, P. Kordopatis and S. Marin provided valuable comments on a previous draft of this  
406 manuscript. We are grateful to J.A. Allen and two anonymous reviewers for their comments  
407 that greatly improved this manuscript. This study was financially supported by a scholarship  
408 awarded to A.B. by the A.G. Leventis Foundation.

409

#### 410 REFERENCES

- 411 **Alberto F. 2009.** MsatAllele\_1. 0: an R package to visualize the binning of microsatellite  
412 alleles. *Journal of Heredity* **100**: 394-397.
- 413 **Alcaide M, Edwards SV, Negro JJ, Serrano D, Tella JL. 2008a.** Extensive polymorphism and  
414 geographical variation at a positively selected MHC class II B gene of the lesser  
415 kestrel (*Falco naumanni*). *Molecular Ecology* **17**: 2652-2665.
- 416 **Alcaide M, Serrano D, Negro JJ, Tella JL, Laaksonen T, Müller C, Gal A, Korpimäki E. 2008b.**  
417 Population fragmentation leads to isolation by distance but not genetic  
418 impoverishment in the philopatric Lesser Kestrel: a comparison with the widespread  
419 and sympatric Eurasian Kestrel. *Heredity* **102**: 190-198.
- 420 **Alcaide M, Serrano D, Tella JL, Negro JJ. 2009.** Strong philopatry derived from capture–  
421 recapture records does not lead to fine-scale genetic differentiation in Lesser  
422 Kestrels. *Journal of Animal Ecology* **78**: 468-475.
- 423 **Alcala N, Goudet J, Vuilleumier S. 2014.** On the transition of genetic differentiation from  
424 isolation to panmixia: what we can learn from GST and D. *Theoretical population*  
425 *biology* **93**: 75-84.
- 426 **Allendorf FW. 1986.** Genetic drift and the loss of alleles versus heterozygosity. *Zoo Biology*  
427 **5**: 181-190.
- 428 **Allendorf FW, Aitken SN, Luikart G. 2013.** *Conservation and the genetics of populations*. 2nd  
429 edn. Wiley-Blackwell Publishing, Oxford.
- 430 **Amos W, Balmford A. 2001.** When does conservation genetics matter? *Heredity* **87**: 257-  
431 265.
- 432 **Benjamini Y, Hochberg Y. 1995.** Controlling the false discovery rate: a practical and powerful  
433 approach to multiple testing. *Journal of the royal statistical society* **57**: 289-300.
- 434 **BirdLife International. 2017a.** European birds of conservation concern: populations, trends  
435 and national responsibilities. BirdLife International, Cambridge.

- 436 **BirdLife International. 2017b.** Species factsheet: *Falco naumanni*. Downloaded from  
437 <http://www.birdlife.org> on 21/03/2017.
- 438 **Bounas A, Panuccio M, Evangelidis A, Sotiropoulos K, Barboutis C. 2016a.** The Migration of  
439 the Lesser Kestrel *Falco naumanni* in Eastern Europe-A Ringing Recovery and Direct  
440 Observation Approach. *Acrocephalus* **37**: 49-56.
- 441 **Bounas A, Tsiakiris R, Vlachopoulos K, Bukas N, Stara K, Sotiropoulos K. 2016b.** Large  
442 Premigratory Roost of Lesser Kestrels (*Falco naumanni*) in Ioannina City, Greece:  
443 Trends, Roost Characteristics, and Implications for Conservation. *Journal of Raptor*  
444 *Research* **50**: 416-421.
- 445 **Cornuet JM, Luikart G. 1996.** Description and power analysis of two tests for detecting  
446 recent population bottlenecks from allele frequency data. *Genetics* **144**: 2001–2014.
- 447 **Corso A, Viganò M, Jansen JJ, Starnini L. 2016.** Geographical plumage variation in Lesser  
448 Kestrel. *Dutch Birding* **38**: 271-292.
- 449 **Cramp S, Simmons K. 1980.** Birds of the Western Palearctic, Vol. 2: Oxford University Press,  
450 Oxford.
- 451 **Cristescu R, Sherwin WB, Handasyde K, Cahill V, Cooper DW. 2010.** Detecting bottlenecks  
452 using BOTTLENECK 1.2.02 in wild populations: the importance of the microsatellite  
453 structure. *Conservation Genetics* **11**: 1043-1049.
- 454 **Di Maggio R, Mengoni C, Mucci N, Campobello D, Randi E, Sarà M. 2014.** Do not disturb the  
455 family: roles of colony size and human disturbance in the genetic structure of lesser  
456 kestrel. *Journal of Zoology* **295**: 108-115.
- 457 **Do C, Waples RS, Peel D, Macbeth G, Tillett BJ, Ovenden JR. 2014.** NeEstimator v2:  
458 re-implementation of software for the estimation of contemporary effective  
459 population size ( $N_e$ ) from genetic data. *Molecular Ecology Resources* **14**: 209-214.
- 460 **Dyer R. 2014.** GSTUDIO: Analyses and functions related to the spatial analysis of genetic  
461 marker data. *R package version 3*.
- 462 **Earl DA, vonHoldt BM. 2012.** STRUCTURE HARVESTER: a website and program for visualizing  
463 STRUCTURE output and implementing the Evanno method. *Conservation Genetics*  
464 *Resources* **4**: 359-361.
- 465 **Evanno G, Regnaut S, Goudet J. 2005.** Detecting the number of clusters of individuals using  
466 the software STRUCTURE: a simulation study. *Molecular Ecology* **14**: 2611-2620.
- 467 **Excoffier L, Lischer HE. 2010.** Arlequin suite ver 3.5: a new series of programs to perform  
468 population genetics analyses under Linux and Windows. *Molecular Ecology*  
469 *Resources* **10**: 564-567.
- 470 **Falush D, Stephens M, Pritchard JK. 2003.** Inference of population structure using multilocus  
471 genotype data: linked loci and correlated allele frequencies. *Genetics* **164**: 1567-  
472 1587.
- 473 **Frantz A, Cellina S, Krier A, Schley L, Burke T. 2009.** Using spatial Bayesian methods to  
474 determine the genetic structure of a continuously distributed population: clusters or  
475 isolation by distance? *Journal of Applied Ecology* **46**: 493-505.
- 476 **Garcia JT, Alda F, Terraube J, Mougeot F, Sternalski A, Bretagnolle V, Arroyo B. 2011.**  
477 Demographic history, genetic structure and gene flow in a steppe-associated raptor  
478 species. *BMC Evolutionary Biology* **11**: 333.
- 479 **Gerlach G, Jueterbock A, Kraemer P, Deppermann J, Harmand P. 2010.** Calculations of  
480 population differentiation based on GST and D: forget GST but not all of statistics!  
481 *Molecular Ecology* **19**: 3845-3852.
- 482 **Goudet J. 2002.** FSTAT version 2.9.3.2, a program to estimate and test gene diversities and  
483 fixation indices. *Institute of Ecology, Lausanne, Switzerland. Website* <http://www2.unil.ch/popgen/softwares/fstat.htm> [accessed 20 August 2012].
- 484 **Gustin M, Mendi M, Pedrelli M. 2011.** Grillaio nato a Montescaglioso (MT) si riproduce in  
485 Emilia-Romagna. *Picus* **37**: 83 (in Italian).
- 486

- 487 **Hanski I, Gaggiotti OE. 2004.** *Ecology, genetics, and evolution of metapopulations*. Academic  
488 Press.
- 489 **Hill WG. 1981.** Estimation of effective population size from data on linkage disequilibrium.  
490 *Genetical research* **38**: 209-216.
- 491 **Holderegger R, Kamm U, Gugerli F. 2006.** Adaptive vs. neutral genetic diversity: implications  
492 for landscape genetics. *Landscape Ecology* **21**: 797-807.
- 493 **Hubisz MJ, Falush D, Stephens M, Pritchard JK. 2009.** Inferring weak population structure  
494 with the assistance of sample group information. *Molecular Ecology Resources* **9**:  
495 1322-1332.
- 496 **Iñigo A, Barov B. 2010.** Action Plan for the Lesser Kestrel (*Falco naumanni*) in the European  
497 Union. SEO Birdlife & Birdlife International for the European Commission, Madrid.
- 498 **Jensen JL, Bohonak AJ, Kelley ST. 2005.** Isolation by distance, web service. *BMC genetics* **6**:  
499 13.
- 500 **Kalinowski ST. 2005.** HP-Rare: a computer program for performing rarefaction on measures  
501 of allelic diversity. *Molecular Ecology Notes* **5**: 187-189.
- 502 **Keenan K, McGinnity P, Cross TF, Crozier WW, Prodöhl PA. 2013.** diveRsity: an R package  
503 for the estimation and exploration of population genetics parameters and their  
504 associated errors. *Methods in Ecology and Evolution* **4**: 782-788.
- 505 **Kmetova E, Zhelev P, Mechev A, Gradev G, Ivanov I. 2012.** Natural Colonies of Lesser  
506 Kestrel (*Falco naumanni*) in European Turkey and Discussion on the Chances of  
507 Natural Re-colonization of the Species in Bulgaria. *Acta Zoologica Bulgarica* **4**: 47-54.
- 508 **Lagnel J. 2015.** ParaStructure. GitHub repository [https://github.com/jacqueslagnel/](https://github.com/jacqueslagnel/parastructure)  
509 [parastructure](https://github.com/jacqueslagnel/parastructure).
- 510 **Liven-Schulman I, Leshem Y, Alon D, Yom-Tov Y. 2004.** Causes of population declines of the  
511 Lesser Kestrel *Falco naumanni* in Israel. *Ibis* **146**: 145-152.
- 512 **Luikart G, Allendorf F, Cornuet J, Sherwin W. 1998.** Distortion of allele frequency  
513 distributions provides a test for recent population bottlenecks. *Journal of Heredity*  
514 **89**: 238-247.
- 515 **Meirmans PG. 2015.** Seven common mistakes in population genetics and how to avoid  
516 them. *Molecular Ecology* **24**: 3223-3231.
- 517 **Mikulic K, Ivan Budinski, Antica Culina, Luka Jurinovic, Lucic V. 2013.** The return of the  
518 Lesser Kestrel (*Falco naumanni*) as a breeding bird to Croatia. *Acrocephalus* **34**: 71-  
519 74.
- 520 **Miller MP, Mullins TD, Parrish Jr JW, Walters JR, Haig SM. 2012.** Variation in migratory  
521 behavior influences regional genetic diversity and structure among American Kestrel  
522 populations (*Falco sparverius*) in North America. *Journal of Heredity* **103**: 503-514.
- 523 **Morandini V, Benito E, Newton I, Ferrer M. 2017.** Natural expansion versus translocation in  
524 a previously human-persecuted bird of prey. *Ecology and Evolution* **7**: 3682-3688.
- 525 **Moritz C. 1994.** Defining 'evolutionarily significant units' for conservation. *Trends in Ecology*  
526 *& Evolution* **9**: 373-375.
- 527 **Negro JJ. 1997.** Lesser Kestrel *Falco naumanni*. Birds of the Western Palearctic. Update 1,  
528 49-56..
- 529 **Negro JJ, Hiraldo F, Donázar JA. 1997.** Causes of natal dispersal in the lesser kestrel:  
530 inbreeding avoidance or resource competition? *Journal of Animal Ecology* **66**: 640-  
531 648.
- 532 **Nesje M, Røed KH, Lifjeld JT, Lindberg P, Steen OF. 2000.** Genetic relationships in the  
533 peregrine falcon (*Falco peregrinus*) analysed by microsatellite DNA markers.  
534 *Molecular Ecology* **9**: 53-60.
- 535 **Newton I, Olsen P. 1990.** *Birds of prey*. Merehurst Press, London.

- 536 **Ortego J, Aparicio JM, Cordero PJ, Calabuig G. 2008a.** Individual genetic diversity correlates  
537 with the size and spatial isolation of natal colonies in a bird metapopulation.  
538 *Proceedings of the Royal Society of London B: Biological Sciences* **275**: 2039-2047.
- 539 **Ortego J, Calabuig G, Aparicio JM, Cordero PJ. 2008b.** Genetic consequences of natal  
540 dispersal in the colonial lesser kestrel. *Molecular Ecology* **17**: 2051-2059.
- 541 **Ortego J, González EG, Sánchez-Barbudo I, Aparicio JM, Cordero PJ. 2007.** Novel highly  
542 polymorphic loci and cross-amplified microsatellites for the lesser kestrel *Falco*  
543 *naumanni*. *Ardeola* **54**: 101-108.
- 544 **Padilla JA, Parejo JC, Salazar J, Martínez-Trancón M, Rabasco A, Sansinforiano E, Quesada**  
545 **A. 2009.** Isolation and characterization of polymorphic microsatellite markers in  
546 lesser kestrel (*Falco naumanni*) and cross-amplification in common kestrel (*Falco*  
547 *tinnunculus*). *Conservation Genetics* **10**: 1357-1360.
- 548 **Palsbøll PJ, Berube M, Allendorf FW. 2007.** Identification of management units using  
549 population genetic data. *Trends in Ecology & Evolution* **22**: 11-16.
- 550 **Peakall R, Smouse PE. 2012.** GenAEx 6.5: genetic analysis in Excel. Population genetic  
551 software for teaching and research—an update. *Bioinformatics* **28**: 2537-2539.
- 552 **Piry S, Luikart G, Cornuet JM. 1999.** BOTTLENECK: a computer program for detecting recent  
553 reductions in the effective size using allele frequency data. *Journal of Heredity* **90**:  
554 502-503.
- 555 **Pritchard JK, Stephens M, Donnelly P. 2000.** Inference of population structure using  
556 multilocus genotype data. *Genetics* **155**: 945-959.
- 557 **R Core Team. 2015.** R: A language and environment for statistical computing. R Foundation  
558 for Statistical Computing, Vienna, Austria. Available at: <https://www.R-project.org/>.
- 559 **Rodriguez A, Negro JJ, Bustamante J, Fox JW, Afanasyev V. 2009.** Geolocators map the  
560 wintering grounds of threatened Lesser Kestrels in Africa. *Diversity and Distributions*  
561 **15**: 1010-1016.
- 562 **Rosenberg NA. 2004.** DISTRUCT: a program for the graphical display of population structure.  
563 *Molecular Ecology Notes* **4**: 137-138.
- 564 **Sarà M. 2010.** Climate and land-use changes as determinants of lesser kestrel *Falco*  
565 *naumanni* abundance in Mediterranean cereal steppes (Sicily). *Ardeola* **57**: 3-22.
- 566 **Serrano D, Tella JL. 2003.** Dispersal within a spatially structured population of lesser  
567 kestrels: the role of spatial isolation and conspecific attraction. *Journal of Animal*  
568 *Ecology* **72**: 400-410.
- 569 **Serrano D, Tella JL, Donázar JA, Pomarol M. 2003.** Social and individual features affecting  
570 natal dispersal in the colonial lesser kestrel. *Ecology* **84**: 3044-3054.
- 571 **Sundqvist L, Keenan K, Zackrisson M, Prodöhl P, Kleinhans D. 2016.** Directional genetic  
572 differentiation and relative migration. *Ecology and Evolution* **6**: 3461-3475.
- 573 **Szczys P, Oswald SA, Arnold JM. 2017.** Conservation implications of long-distance migration  
574 routes: Regional metapopulation structure, asymmetrical dispersal, and population  
575 declines. *Biological Conservation* **209**: 263-272.
- 576 **Taylor B, Dizon A. 1999.** First policy then science: why a management unit based solely on  
577 genetic criteria cannot work. *Molecular Ecology* **8**.
- 578 **Toonen RJ, Hughes S. 2001.** Increased throughput for fragment analysis on an ABI Prism®  
579 377 automated sequencer using a membrane comb and STRand software.  
580 *Biotechniques* **31**: 1320-1325.
- 581 **Uzunova D, Lisichanets E. 2016.** Lesser Kestrel's population and conservation status in  
582 Macedonia. In: *Abstracts of the International Lesser Kestrel Expert Workshop*,  
583 Plovdiv, Bulgaria.
- 584 **Van Oosterhout C, Hutchinson WF, Wills DP, Shipley P. 2004.** MICRO-CHECKER: software for  
585 identifying and correcting genotyping errors in microsatellite data. *Molecular*  
586 *Ecology Notes* **4**: 535-538.

587 **Vucetich JA, Waite TA. 2003.** Spatial patterns of demography and genetic processes across  
588 the species' range: null hypotheses for landscape conservation genetics.  
589 *Conservation Genetics* **4**: 639-645.

590 **Waples RS. 2006.** A bias correction for estimates of effective population size based on  
591 linkage disequilibrium at unlinked gene loci. *Conservation Genetics* **7**: 167.

592 **Waples RS, Do C. 2010.** Linkage disequilibrium estimates of contemporary Ne using highly  
593 variable genetic markers: a largely untapped resource for applied conservation and  
594 evolution. *Evolutionary Applications* **3**: 244-262.

595 **Williamson-Natesan EG. 2005.** Comparison of methods for detecting bottlenecks from  
596 microsatellite loci. *Conservation Genetics* **6**: 551-562.

597 **Willoughby JR, Sundaram M, Wijayawardena BK, Lamb MC, Kimble SJ, Ji Y, Fernandez NB,**  
598 **Antonides JD, Marra NJ, Dewoody JA. 2017.** Biome and migratory behaviour  
599 significantly influence vertebrate genetic diversity. *Biological Journal of the Linnean*  
600 *Society* **121**: 446-457. **Wink M, Sauer-Gurth H, Pepler D. 2004.** Phylogeographic  
601 relationships of the Lesser Kestrel (*Falco naumanni*) in breeding and wintering  
602 quarters inferred from nucleotide sequences of the mitochondrial cytochrome b  
603 gene. *Raptors worldwide*, 505-510.

604

605

606

607

608

609

610

611

612

613

614

615

616

617

618 **Figure 1.** Map of the Lesser Kestrel populations used in the present study. SES: Andalucia,  
619 ES/BG: Extremadura, APU: Apulia, SIC: Sicily, CRO: Croatia, GIA: Ioannina, LES: Agrinio, TRI:  
620 Trikala, LAR: Larisa, VOL: Volos, KIL: Killis, KAL: Komotini, LIM: Limnos, ISR: Israel, MON:  
621 Mongolia. Shaded areas represent the breeding distribution of the Lesser Kestrel (modified  
622 from BirdLife International). Sampling sites pooled for the analyses are circled (ES: Spain;  
623 CNG: Central-North Greece)

624 **Figure 2.** Admixture proportions (proportions of membership to each of K inferred clusters) of  
625 individual Lesser Kestrels. Upper plots correspond to the number of clusters when the full  
626 dataset was modeled (K = 2, K = 3), whereas the lower 3 plots show admixture proportions of  
627 the CE Mediterranean populations only, for K=2, K=4 and K=5 inferred clusters respectively

628 **Figure 3.** Directional relative migration networks of grouped Lesser Kestrel populations from  
629 CE Mediterranean. Networks were visualized with divMigrate using Alcalá's Nm. (a) all relative  
630 migration rate values (b) only values above 0.2 threshold (c) only gene flow values estimated  
631 >0.4. Line shading and thickness increases with the relative strength of gene flow.

632

633

634

635

636 **Table 1** Measures of genetic variation of all sampled Lesser Kestrel populations. Number of  
 637 genotyped individuals ( $N$ ), number of alleles per locus ( $A$ ), allelic richness ( $A_R$ ), observed ( $H_O$ )  
 638 and expected ( $H_E$ ) heterozygosity, private allelic richness ( $\pi$ ) and inbreeding coefficient ( $F_{IS}$ ).  
 639 Values are presented as means  $\pm$  standard error (in brackets)

| Code  | Location    | $N$ | $A$          | $A_R$        | $H_O$            | $H_E$            | $\pi$ | $F_{IS}$          |
|-------|-------------|-----|--------------|--------------|------------------|------------------|-------|-------------------|
| SES   | Andalucia   | 19  | 7.1<br>(0.9) | 5.4<br>(0.6) | 0.635<br>(0.037) | 0.696<br>(0.037) | 0.17  | 0.082<br>(0.041)  |
| ES/BG | Extremadura | 25  | 8.3<br>(1.3) | 5.6<br>(0.7) | 0.674<br>(0.040) | 0.699<br>(0.037) | 0.26  | 0.029<br>(0.037)  |
| APU   | Apulia      | 44  | 9.4<br>(1.5) | 5.5<br>(0.6) | 0.669<br>(0.038) | 0.707<br>(0.036) | 0.13  | 0.053<br>(0.025)  |
| SIC   | Sicily      | 12  | 5.9<br>(0.8) | 5.1<br>(0.6) | 0.682<br>(0.038) | 0.667<br>(0.041) | 0.18  | -0.045<br>(0.045) |
| CRO   | Croatia     | 14  | 5.6<br>(0.6) | 4.7<br>(0.5) | 0.654<br>(0.048) | 0.650<br>(0.048) | 0.03  | -0.023<br>(0.043) |
| GIA   | Ioannina    | 24  | 7.6<br>(1.1) | 5.2<br>(0.6) | 0.634<br>(0.051) | 0.654<br>(0.048) | 0.16  | 0.036<br>(0.031)  |
| LES   | Agrinio     | 16  | 6.7<br>(0.8) | 5.4<br>(0.6) | 0.603<br>(0.058) | 0.684<br>(0.042) | 0.18  | 0.136<br>(0.047)  |
| TRI   | Trikala     | 20  | 7.6<br>(1.3) | 5.5<br>(0.7) | 0.626<br>(0.056) | 0.680<br>(0.046) | 0.08  | 0.087<br>(0.046)  |
| LAR   | Larisa      | 20  | 7.4<br>(1.1) | 5.4<br>(0.6) | 0.669<br>(0.053) | 0.680<br>(0.044) | 0.09  | 0.024<br>(0.045)  |
| VOL   | Volos       | 20  | 7.6<br>(1.2) | 5.5<br>(0.7) | 0.678<br>(0.051) | 0.662<br>(0.048) | 0.13  | -0.027<br>(0.035) |
| KIL   | Kilkis      | 13  | 6.4<br>(0.9) | 5.3<br>(0.7) | 0.621<br>(0.062) | 0.661<br>(0.048) | 0.09  | 0.067<br>(0.064)  |
| KAL   | Komotini    | 20  | 7.1<br>(1.1) | 5.3<br>(0.6) | 0.689<br>(0.053) | 0.677<br>(0.046) | 0.04  | -0.019<br>(0.040) |
| LIM   | Limnos      | 11  | 5.1<br>(0.6) | 4.8<br>(0.5) | 0.661<br>(0.060) | 0.667<br>(0.041) | 0.09  | 0.024<br>(0.060)  |
| ISR   | Israel      | 20  | 7.3<br>(1.1) | 5.5<br>(0.7) | 0.619<br>(0.062) | 0.682<br>(0.042) | 0.28  | 0.124<br>(0.055)  |
| MON   | Mongolia    | 17  | 7.2<br>(1.0) | 5.4<br>(0.6) | 0.585<br>(0.057) | 0.655<br>(0.049) | 0.52  | 0.155<br>(0.046)  |

640

641

642

643 **Table 2** Pairwise  $F_{st}$ -values (below diagonal) and  $D_{est}$ -values (above diagonal) among Lesser Kestrel populations. Statistically significant values after B-H  
 644 correction for multiple comparisons are given in bold ( $p < 0.039$ )

|     | SES   | ES/BG        | APU          | SIC          | CRO          | GIA          | LES          | TRI          | LAR          | VOL          | KIL          | KAL          | LIM          | ISR          | MON          |              |
|-----|-------|--------------|--------------|--------------|--------------|--------------|--------------|--------------|--------------|--------------|--------------|--------------|--------------|--------------|--------------|--------------|
| 645 |       |              |              |              |              |              |              |              |              |              |              |              |              |              |              |              |
| 646 | SES   | -            | 0.018        | <b>0.038</b> | <b>0.099</b> | <b>0.132</b> | <b>0.048</b> | <b>0.053</b> | 0.014        | 0.030        | <b>0.053</b> | 0.016        | <b>0.027</b> | <b>0.147</b> | <b>0.059</b> | <b>0.093</b> |
| 647 | ES/BG | 0.000        | -            | <b>0.035</b> | <b>0.096</b> | <b>0.138</b> | <b>0.056</b> | <b>0.049</b> | 0.015        | <b>0.046</b> | 0.003        | 0.029        | <b>0.041</b> | <b>0.160</b> | <b>0.069</b> | <b>0.126</b> |
| 648 | APU   | 0.001        | 0.004        | -            | <b>0.100</b> | <b>0.103</b> | <b>0.076</b> | <b>0.072</b> | 0.014        | <b>0.021</b> | <b>0.041</b> | <b>0.030</b> | <b>0.052</b> | <b>0.143</b> | <b>0.054</b> | <b>0.121</b> |
| 649 | SIC   | <b>0.026</b> | <b>0.035</b> | <b>0.029</b> | -            | <b>0.167</b> | <b>0.105</b> | <b>0.128</b> | <b>0.111</b> | <b>0.099</b> | <b>0.108</b> | <b>0.069</b> | <b>0.096</b> | <b>0.175</b> | <b>0.115</b> | <b>0.183</b> |
| 650 | CRO   | <b>0.033</b> | <b>0.032</b> | <b>0.026</b> | <b>0.048</b> | -            | <b>0.152</b> | <b>0.117</b> | <b>0.101</b> | <b>0.112</b> | <b>0.146</b> | <b>0.117</b> | <b>0.130</b> | <b>0.191</b> | <b>0.117</b> | <b>0.168</b> |
| 651 | GIA   | <b>0.012</b> | <b>0.018</b> | <b>0.019</b> | <b>0.035</b> | <b>0.044</b> | -            | <b>0.077</b> | <b>0.027</b> | <b>0.078</b> | <b>0.065</b> | 0.026        | <b>0.054</b> | <b>0.143</b> | <b>0.088</b> | <b>0.151</b> |
| 652 | LES   | <b>0.013</b> | <b>0.014</b> | <b>0.019</b> | <b>0.038</b> | <b>0.033</b> | <b>0.029</b> | -            | <b>0.065</b> | <b>0.084</b> | <b>0.072</b> | <b>0.050</b> | <b>0.067</b> | <b>0.183</b> | <b>0.074</b> | <b>0.158</b> |
| 653 | TRI   | 0.003        | 0.005        | 0.004        | <b>0.033</b> | <b>0.027</b> | 0.009        | <b>0.023</b> | -            | 0.000        | <b>0.035</b> | 0.000        | 0.000        | <b>0.100</b> | <b>0.030</b> | <b>0.110</b> |
| 654 | LAR   | 0.005        | <b>0.010</b> | 0.006        | <b>0.032</b> | <b>0.036</b> | <b>0.019</b> | <b>0.030</b> | 0.000        | -            | 0.027        | 0.005        | <b>0.028</b> | <b>0.153</b> | <b>0.064</b> | <b>0.112</b> |
|     | VOL   | 0.010        | 0.004        | <b>0.013</b> | <b>0.030</b> | <b>0.037</b> | <b>0.018</b> | <b>0.018</b> | 0.012        | 0.012        | -            | 0.015        | <b>0.047</b> | <b>0.132</b> | <b>0.080</b> | <b>0.121</b> |
|     | KIL   | 0.001        | 0.009        | 0.008        | 0.016        | <b>0.034</b> | 0.004        | 0.018        | 0.000        | 0.000        | 0.004        | -            | <b>0.037</b> | <b>0.136</b> | <b>0.020</b> | <b>0.095</b> |
|     | KAL   | <b>0.011</b> | <b>0.013</b> | <b>0.021</b> | <b>0.038</b> | <b>0.044</b> | <b>0.025</b> | <b>0.024</b> | 0.005        | <b>0.010</b> | <b>0.021</b> | <b>0.019</b> | -            | <b>0.092</b> | <b>0.088</b> | <b>0.085</b> |
|     | LIM   | <b>0.035</b> | <b>0.035</b> | <b>0.036</b> | <b>0.051</b> | <b>0.064</b> | <b>0.041</b> | <b>0.046</b> | <b>0.020</b> | <b>0.034</b> | <b>0.040</b> | <b>0.039</b> | <b>0.019</b> | -            | <b>0.152</b> | <b>0.143</b> |
|     | ISR   | <b>0.017</b> | <b>0.019</b> | <b>0.015</b> | <b>0.029</b> | <b>0.035</b> | <b>0.029</b> | <b>0.022</b> | <b>0.015</b> | <b>0.026</b> | <b>0.024</b> | <b>0.012</b> | <b>0.035</b> | <b>0.045</b> | -            | <b>0.094</b> |
|     | MON   | <b>0.032</b> | <b>0.035</b> | <b>0.042</b> | <b>0.055</b> | <b>0.060</b> | <b>0.052</b> | <b>0.053</b> | <b>0.038</b> | <b>0.039</b> | <b>0.043</b> | <b>0.039</b> | <b>0.024</b> | <b>0.042</b> | <b>0.033</b> | -            |



655 **Table 3.** Contemporary effective population sizes ( $N_E$ ) and 95% CI, results of tests for genetic  
 656 bottlenecks: Garza-Williamson M values, Wilcoxon sign-rank tests for heterozygosity excess  
 657 and mode-shift tests for all Lesser Kestrel populations. The Wilcoxon tests were carried using  
 658 the TPM model (5% SMM, 95% IAM). Values in bold are indicative of a bottleneck ( $M < 0.68$   
 659 for the Garza-Williamson ratio and  $P < 0.05$  for the Wilcoxon test)

| Code | Location                | $N_E$                | M           | $P$ (TPM)    | Allele frequency distribution |
|------|-------------------------|----------------------|-------------|--------------|-------------------------------|
| ES   | Spain                   | Not estimated        | <b>0.43</b> | 0.083        | L-shaped                      |
| APU  | Apulia                  | Not estimated        | <b>0.45</b> | 0.148        | L-shaped                      |
| SIC  | Sicily                  | 57.3<br>(29.8-327.7) | <b>0.39</b> | <b>0.007</b> | L-shaped                      |
| CRO  | Croatia                 | 47.7<br>(21.6-82.8)  | <b>0.41</b> | 0.216        | L-shaped                      |
| GIA  | Ioannina                | 26.6<br>(19.5-39.1)  | <b>0.45</b> | 0.390        | L-shaped                      |
| LES  | Agrinio                 | 88.4<br>(40.5-167.8) | <b>0.45</b> | 0.056        | L-shaped                      |
| CNG  | Central-North<br>Greece | Not estimated        | <b>0.45</b> | 0.078        | L-shaped                      |
| LIM  | Limnos                  | 24.2<br>(14.5-55.8)  | <b>0.42</b> | <b>0.004</b> | L-shaped                      |
| ISR  | Israel                  | 54.9<br>(35.8-106.1) | <b>0.43</b> | <b>0.009</b> | L-shaped                      |
| MON  | Mongolia                | Not estimated        | <b>0.42</b> | 0.201        | L-shaped                      |

660

661

662

663

664

665

666

667

668

669

670

671

672

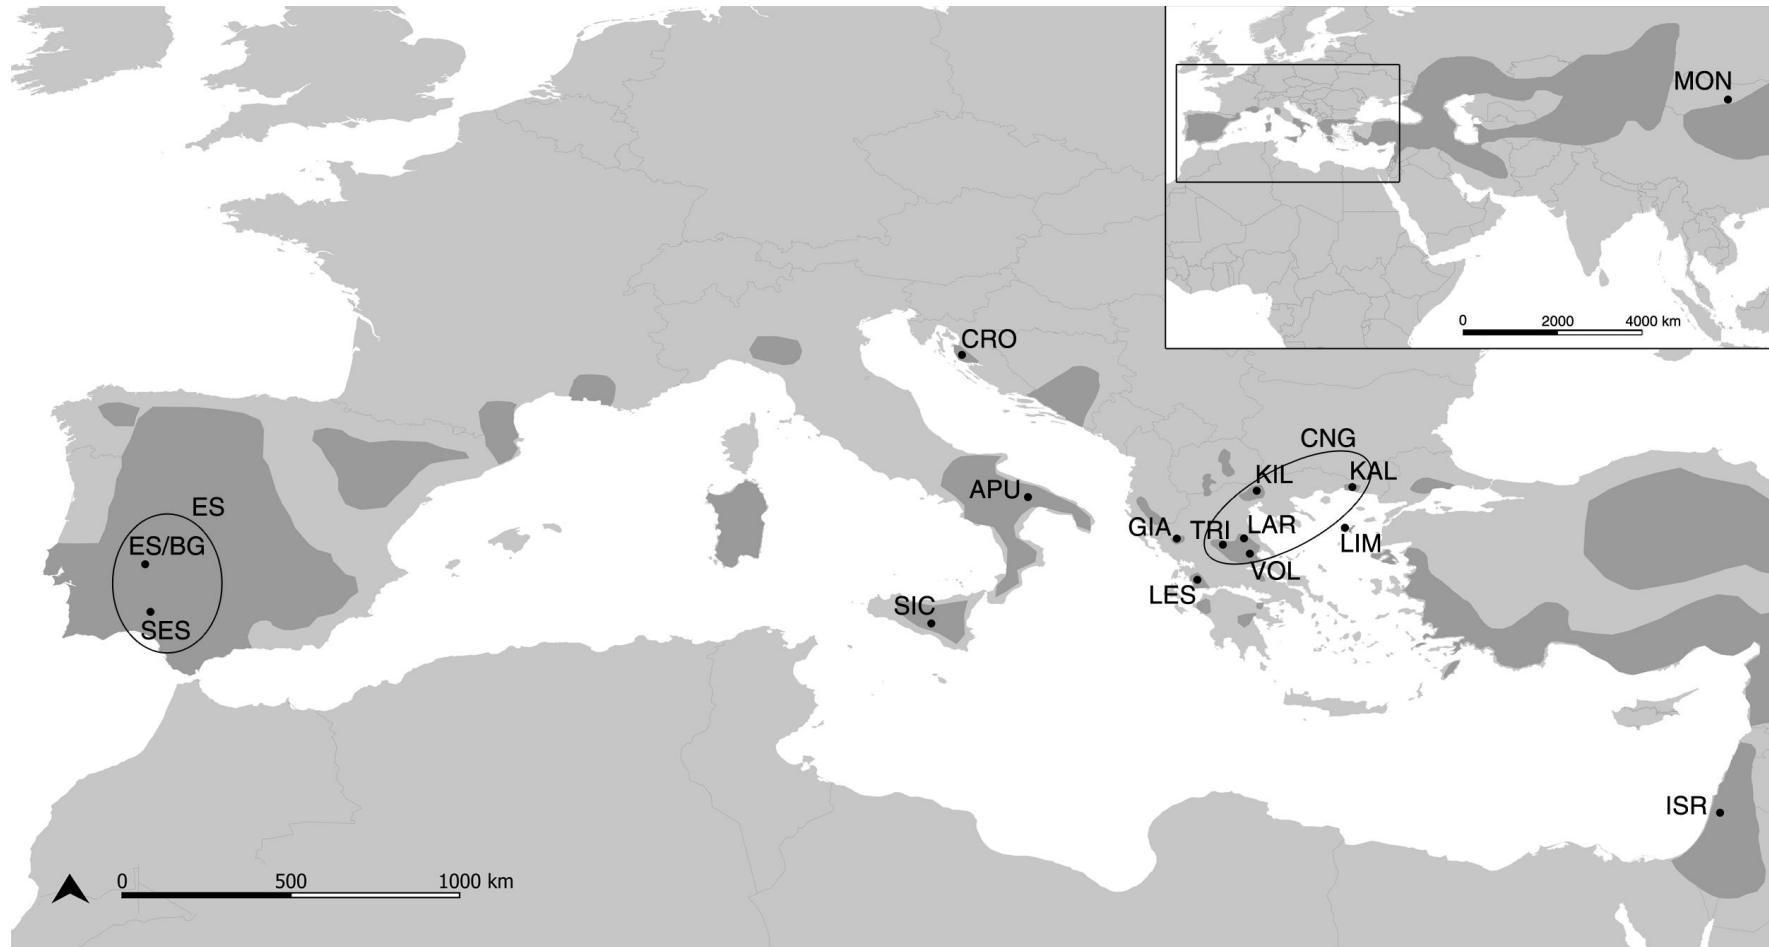

673

674 **Figure 1**

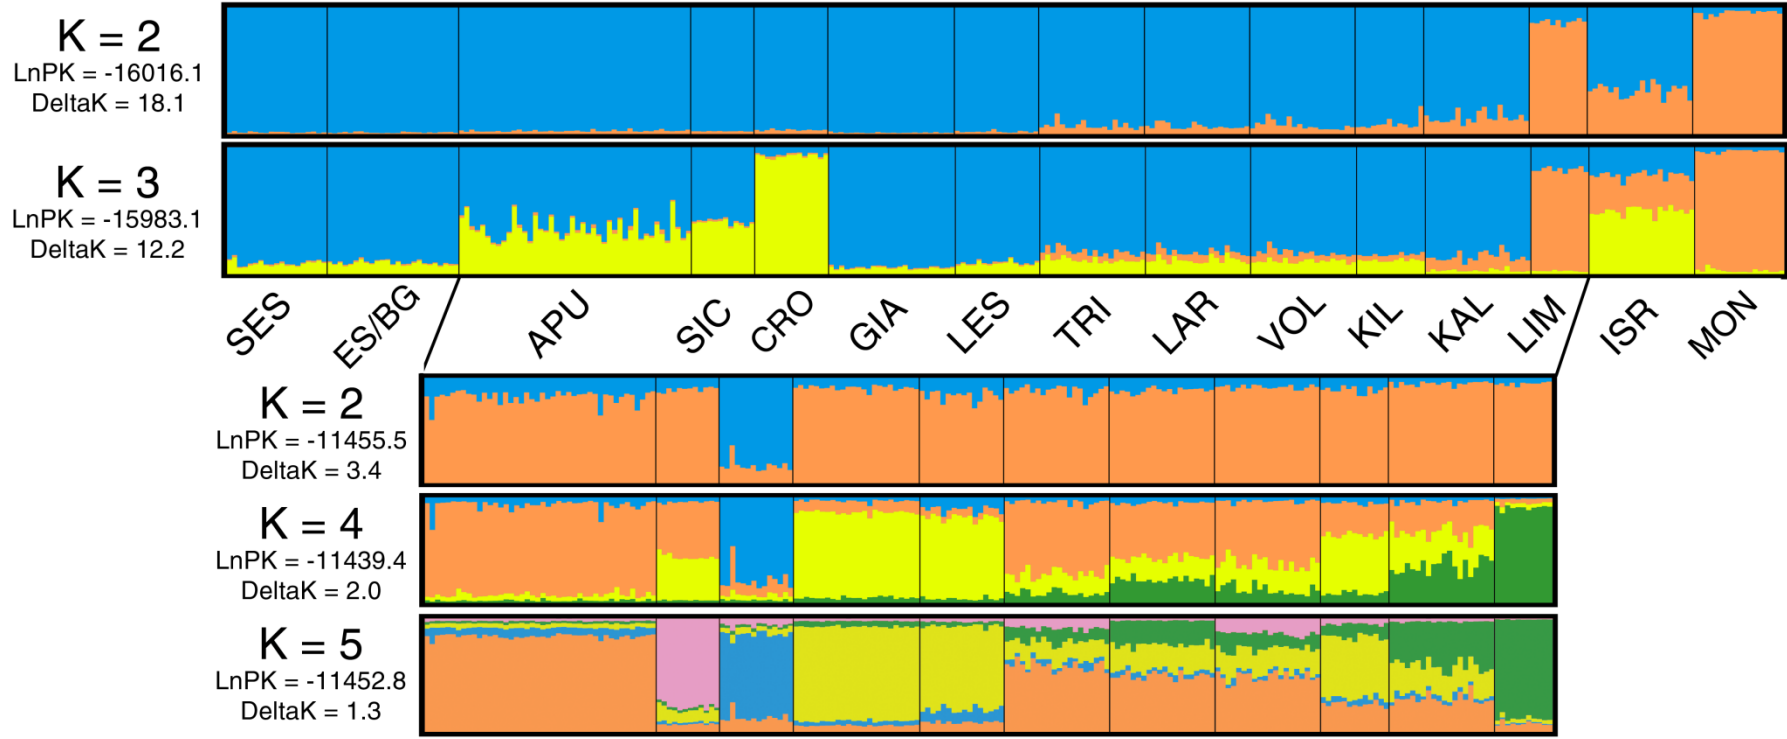

675

676 **Figure 2**

677

678

679

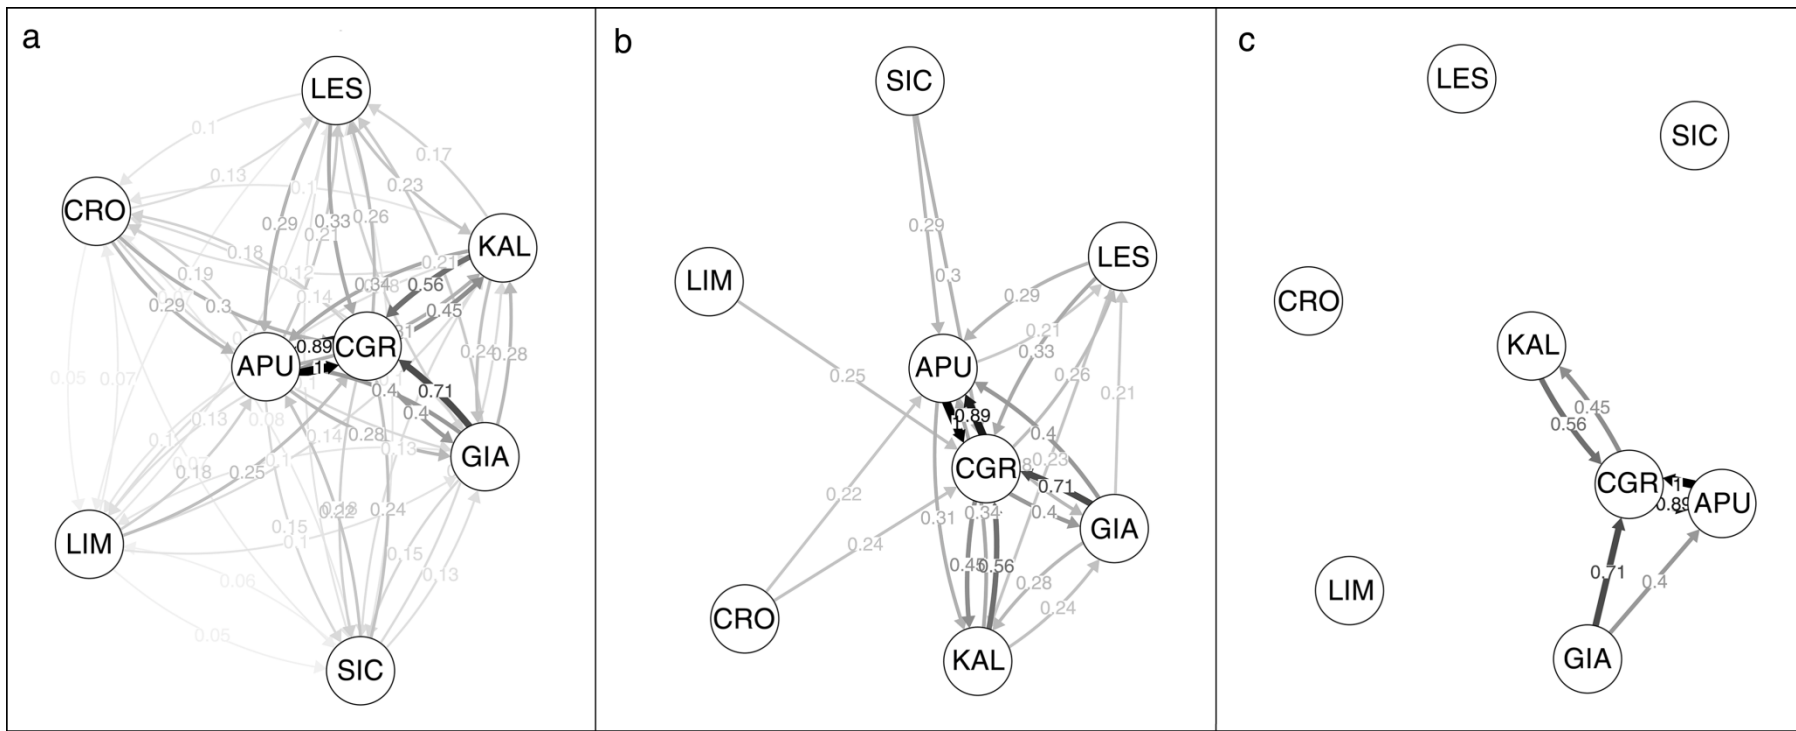

680

681 **Figure 3**
